# Supplementary material for: Evaluation of Optimal Reference Genes for qRT-PCR Analysis in Hyphantria cunea (Drury)
Source: MDPI journal article supplement (doi:10.3390/insects13010097), 2022-01-14
Supplement: s1 [file s1]

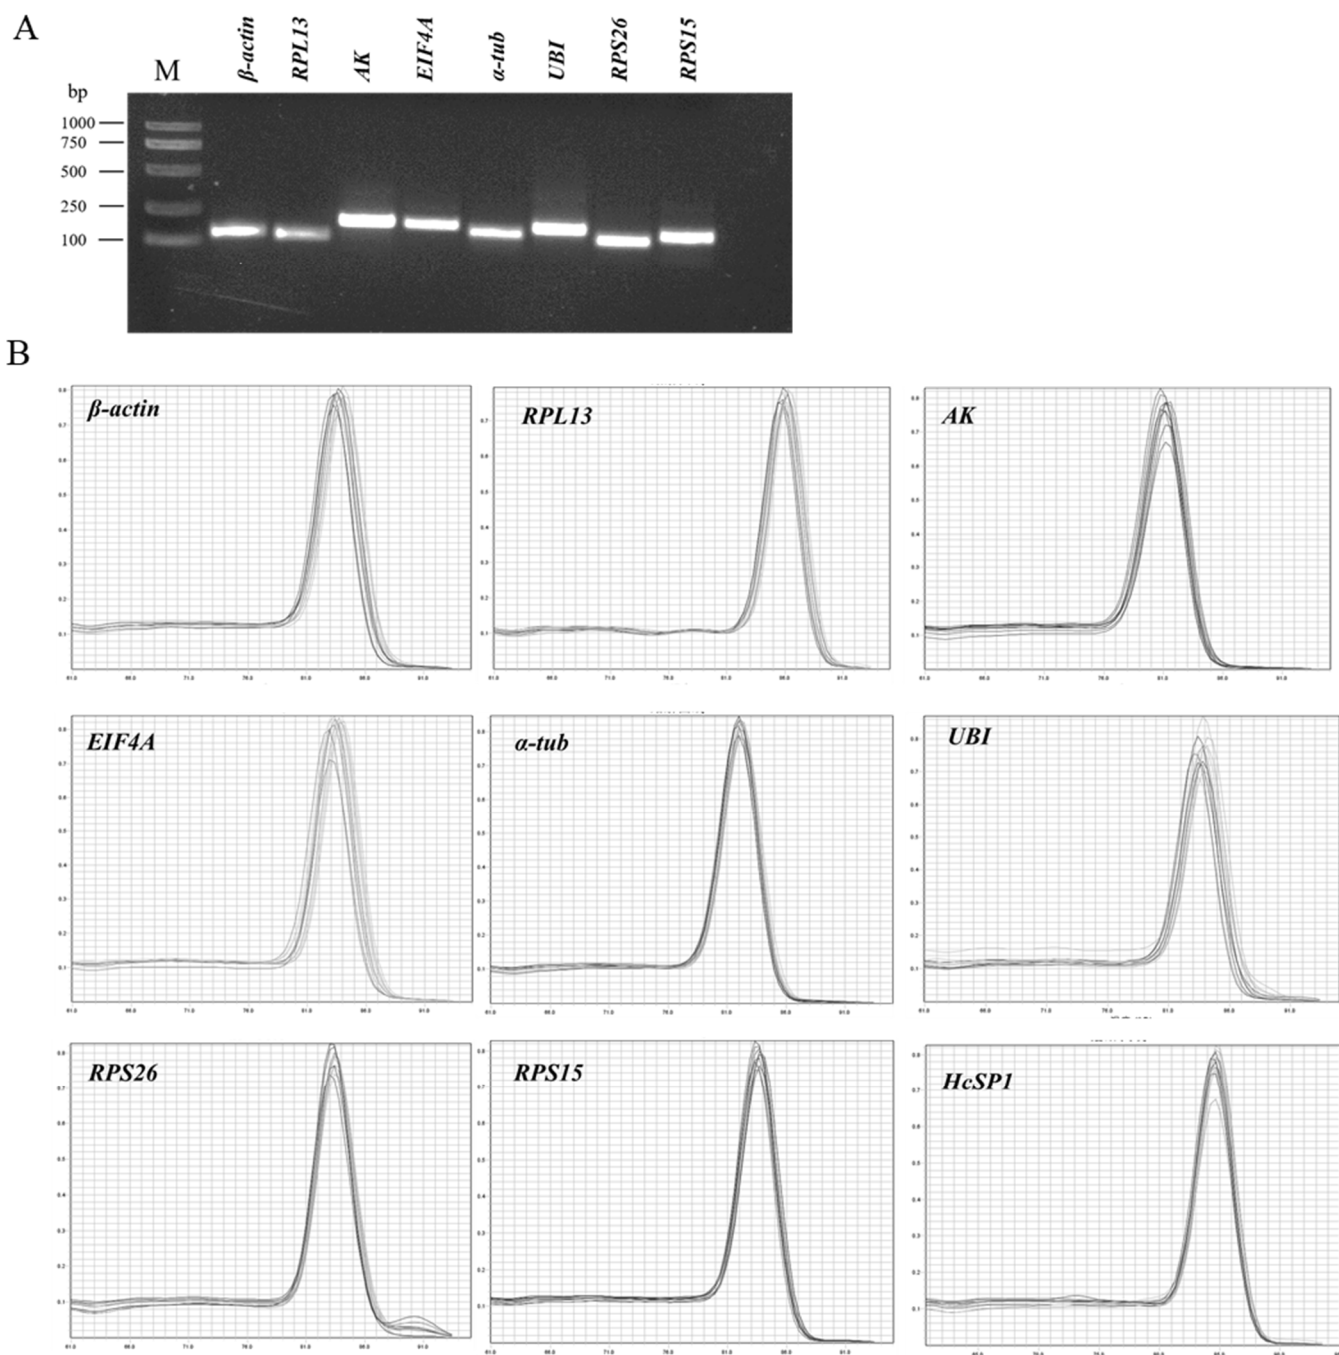

**Figure S1.** Amplification specificity of primers in RT-PCR and qRT-PCR.

A: single amplicon of the expected size for each gene was visualized on a 1 % agarose gel. M, marker. B: single peaks in melt curve analysis.

**Table S1.** Oligonucleotide primers for candidate qRT-PCR reference genes in *H.cunea*

| Gene                                                      | GenBank<br>Accession<br>Number | Primer Sequence (5'→3')                              | Amplicon<br>Size (bp) | Slope   | Efficiency<br>(%) | R <sup>2</sup> |
|-----------------------------------------------------------|--------------------------------|------------------------------------------------------|-----------------------|---------|-------------------|----------------|
| $\beta$ -actin<br>( <i><math>\beta</math>-actin</i> )     | OL409114                       | F: AATGGCTCCGGTATGTGCAA<br>R: ACGAGTCCTTCCGTCCCATA   | 104                   | -2.9051 | 120.91            | 0.9978         |
| Ribosomal<br>protein L13<br>( <i>RPL13</i> )              | OL409115                       | F: TCCATTAAGGCCGGTTGTCC<br>R: TCCATTAAGGCCGGTTGTCC   | 142                   | -2.8027 | 127.40            | 0.9741         |
| Argininase<br>kinase<br>( <i>AK</i> )                     | OL409116                       | F: GTTGAGAGGGAAGCGAGGAT<br>R: GAGTGTGAAAGCGAGCAGAG   | 130                   | -3.2262 | 104.15            | 0.9997         |
| eukaryotic<br>initiation<br>factor 4A<br>( <i>EIF4A</i> ) | OL409117                       | F: TGCGTCTCGGAAGTGTCTGTTA<br>R: GCAGACGGCTTTTCGAATCC | 165                   | -3.1411 | 108.14            | 0.9993         |
| $\alpha$ -tubulin<br>( <i><math>\alpha</math>-TUB</i> )   | OL409118                       | F: TCCATTAAGGCCGGTTGTCC<br>R: AATGCACGGGCTTACAAGGA   | 92                    | -3.0535 | 112.56            | 0.9996         |
| Polyubiquitin<br>( <i>UBI</i> )                           | OL409119                       | F: AATCTTCGCCGGCAAACAAC<br>R: CAGAAGGCTCCACTTCCAGG   | 121                   | -3.1757 | 106.48            | 0.9998         |
| Ribosomal<br>protein S26<br>( <i>RPS26</i> )              | OL409120                       | F: CAGGGACATCAACGAAGCCT<br>R: GGTGCTCTTGGGTGGAGTAC   | 114                   | -3.2577 | 102.75            | 0.9981         |
| Ribosomal<br>protein S15<br>( <i>RPS15</i> )              | OL409121                       | F: GCGTCACTCTCAAGATCAGC<br>R: ATGGTGCAGATCCTCCAGTC   | 101                   | -3.1853 | 106.03            | 0.9994         |
| Serine<br>protease1<br>( <i>HcSPI</i> )                   | MH663425                       | F: CTGGTGGCATGGATGCTAAG<br>R: TTACAGTCCCTCCACACACC   | 102                   | -3.6566 | 87.70             | 0.9971         |
